# Supplementary material for: The hydrothermal synthesis of hierarchical SAPO-34 with improved MTO performance
Source: Royal Society of Chemistry journal article supplement (doi:10.1039/d1nj01066b), 2021-01-01
Supplement: d1nj01066b1.pdf [file d1nj01066b1.pdf]

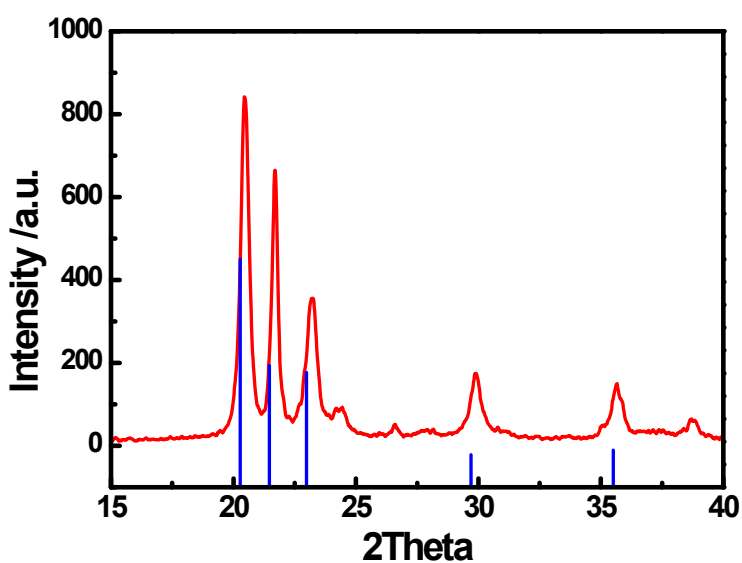

Figure S1 The XRD pattern of the material obtained during the heating process

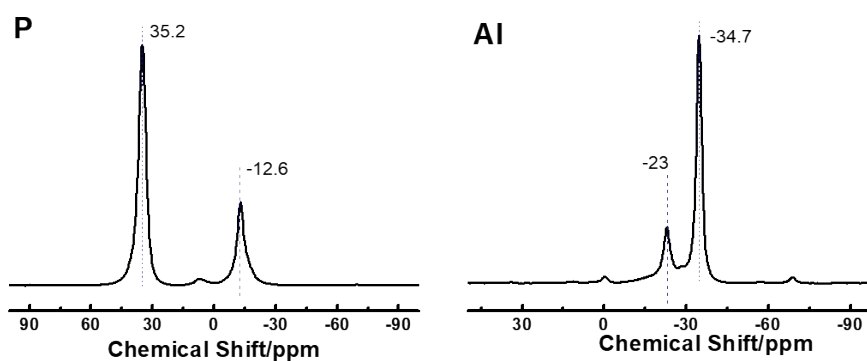

Figure S2 The  $^{31}\text{P}$  MAS NMR and  $^{27}\text{Al}$  MAS NMR spectra of the  $\text{AlPO}_4\text{-A}$  material

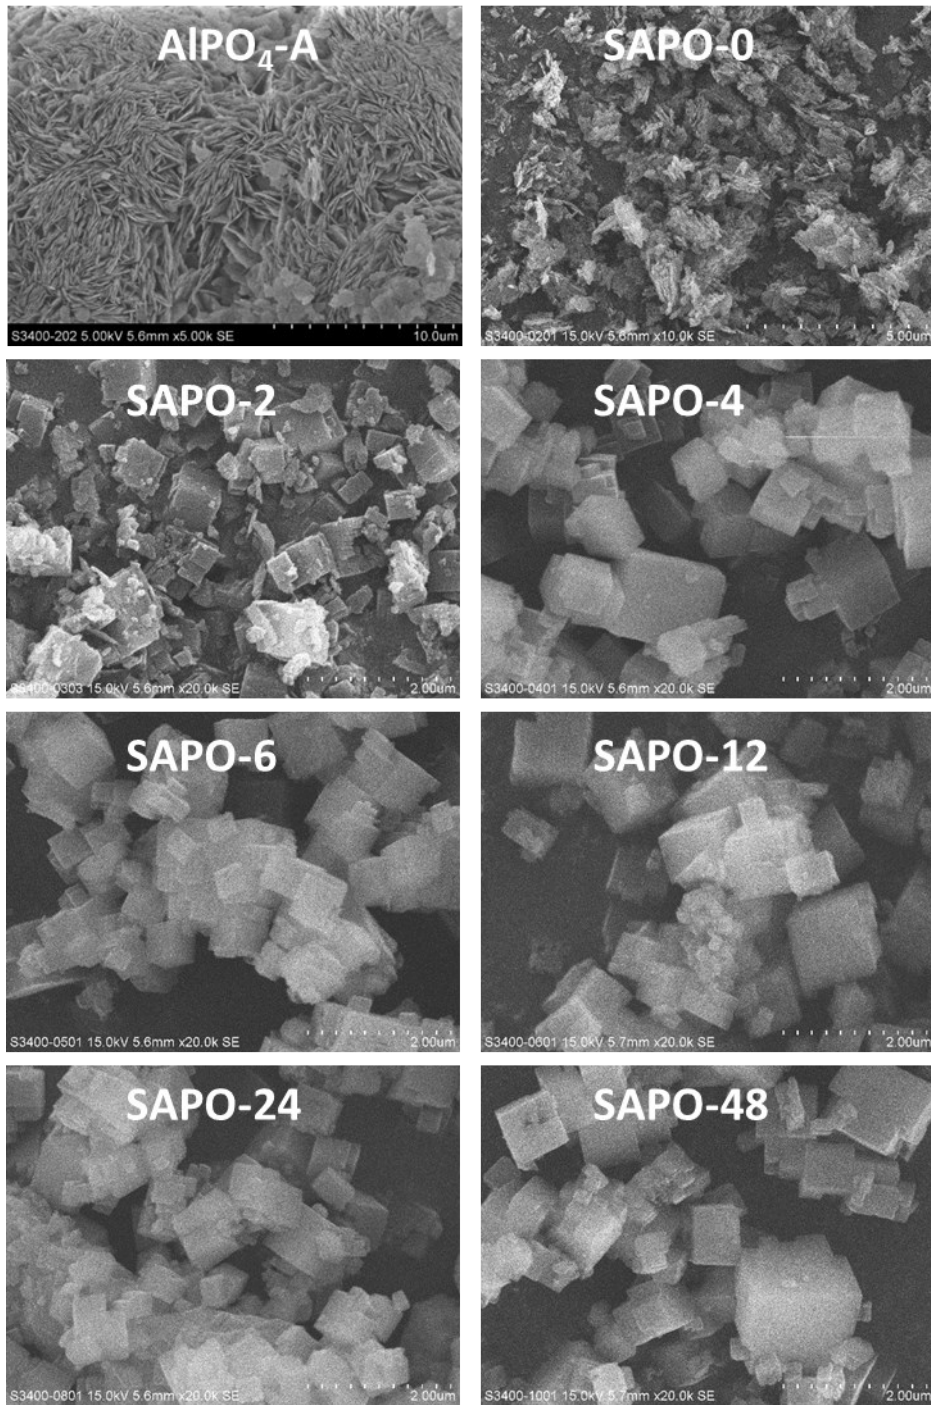

Figure S3 The SEM images of the  $\text{AlPO}_4\text{-A}$  material and the crystallization products obtained in 0-48 h

Table S1 The comparison with the reported methods for hierarchical synthesis with only TEA/TAOH

| Synthesis method                                                     | precursor                                                                                                                                   | Mesopores                                                                                                                  | Crystallization time / h | Ref.       |
|----------------------------------------------------------------------|---------------------------------------------------------------------------------------------------------------------------------------------|----------------------------------------------------------------------------------------------------------------------------|--------------------------|------------|
| Dry-gel conversion                                                   | 1.0 Al <sub>2</sub> O <sub>3</sub> :1.0 P <sub>2</sub> O <sub>5</sub> :0.6SiO <sub>2</sub> :2.0 TEAOH                                       | Hollow structure, the intracrystalline meso/macro-pores, which can only be accessed through the crystalline 8-ring channel | >12                      | [24]       |
| Seeding                                                              | 1.0Al <sub>2</sub> O <sub>3</sub> :1.0P <sub>2</sub> O <sub>5</sub> :(0.2~5.0)TEA:(0.4~0.8)SiO <sub>2</sub> :70H <sub>2</sub> O, 8%wt seeds | Intracrystalline micro/macro-pores, part of which connected directly to the crystal surface                                | >6                       | [21],[35]  |
| Two-step approach with crystalline AlPO <sub>4</sub> as intermediate | 1.0Al <sub>2</sub> O <sub>3</sub> :1.0P <sub>2</sub> O <sub>5</sub> :2TEA:0.5TEAOH:0.3SiO <sub>2</sub> :31H <sub>2</sub> O, 8%wt seeds      | Intracrystalline mesopores, almost all of which can be accessed through the zeolite surface                                | >4                       | This paper |

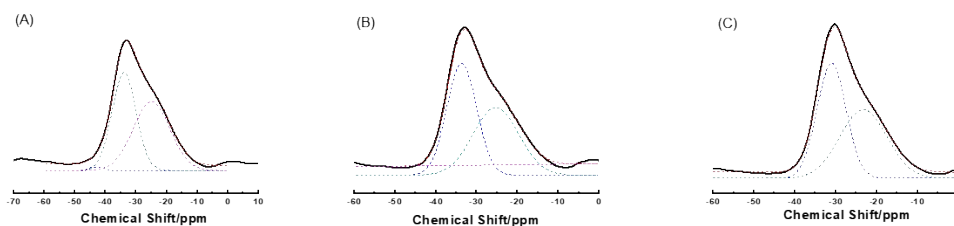

Figure S4 The peak-fitting of the  $^{31}\text{P}$  MAS NMR spectra of (A) SPAO-34-31, (B) SAPO-34-11, and (C) SAPO-34-II

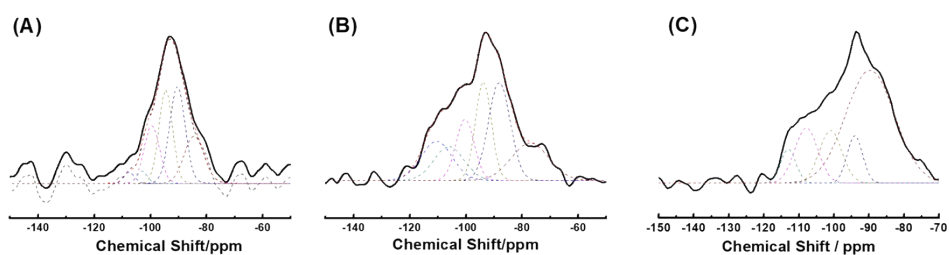

Figure S5 The peak-fitting of the  $^{29}\text{Si}$  MAS NMR spectra of (A) SPAO-34-31, (B) SAPO-34-11, and (C) SAPO-34-II

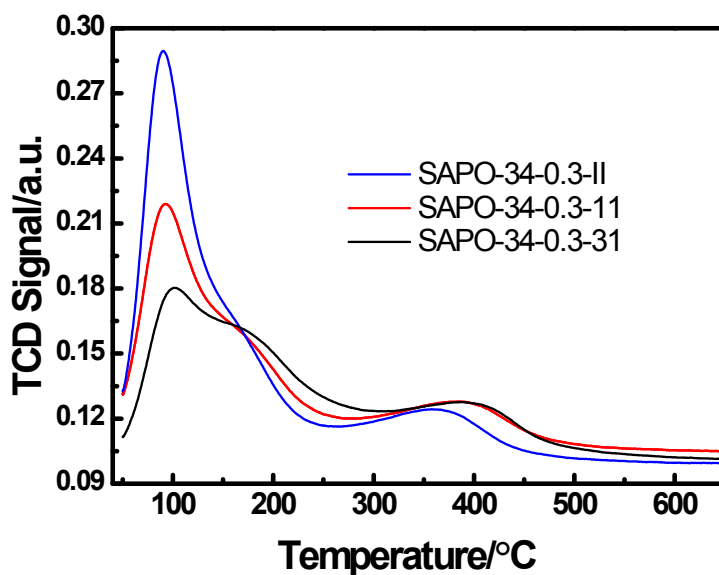

Figure S6 The  $\text{NH}_3$ -TPD profile of the SAPO-34 samples
